# Supplementary material for: Context-dependent function of TSLP and IL-1β in skin allergic sensitization and atopic march
Source: PubMed Central journal article supplement (PMC9437001; doi:10.1038/s41467-022-32196-1), 2022-09-01
Supplement: 41467_2022_32196_MOESM1_ESM.pdf [file 41467_2022_32196_MOESM1_ESM.pdf]

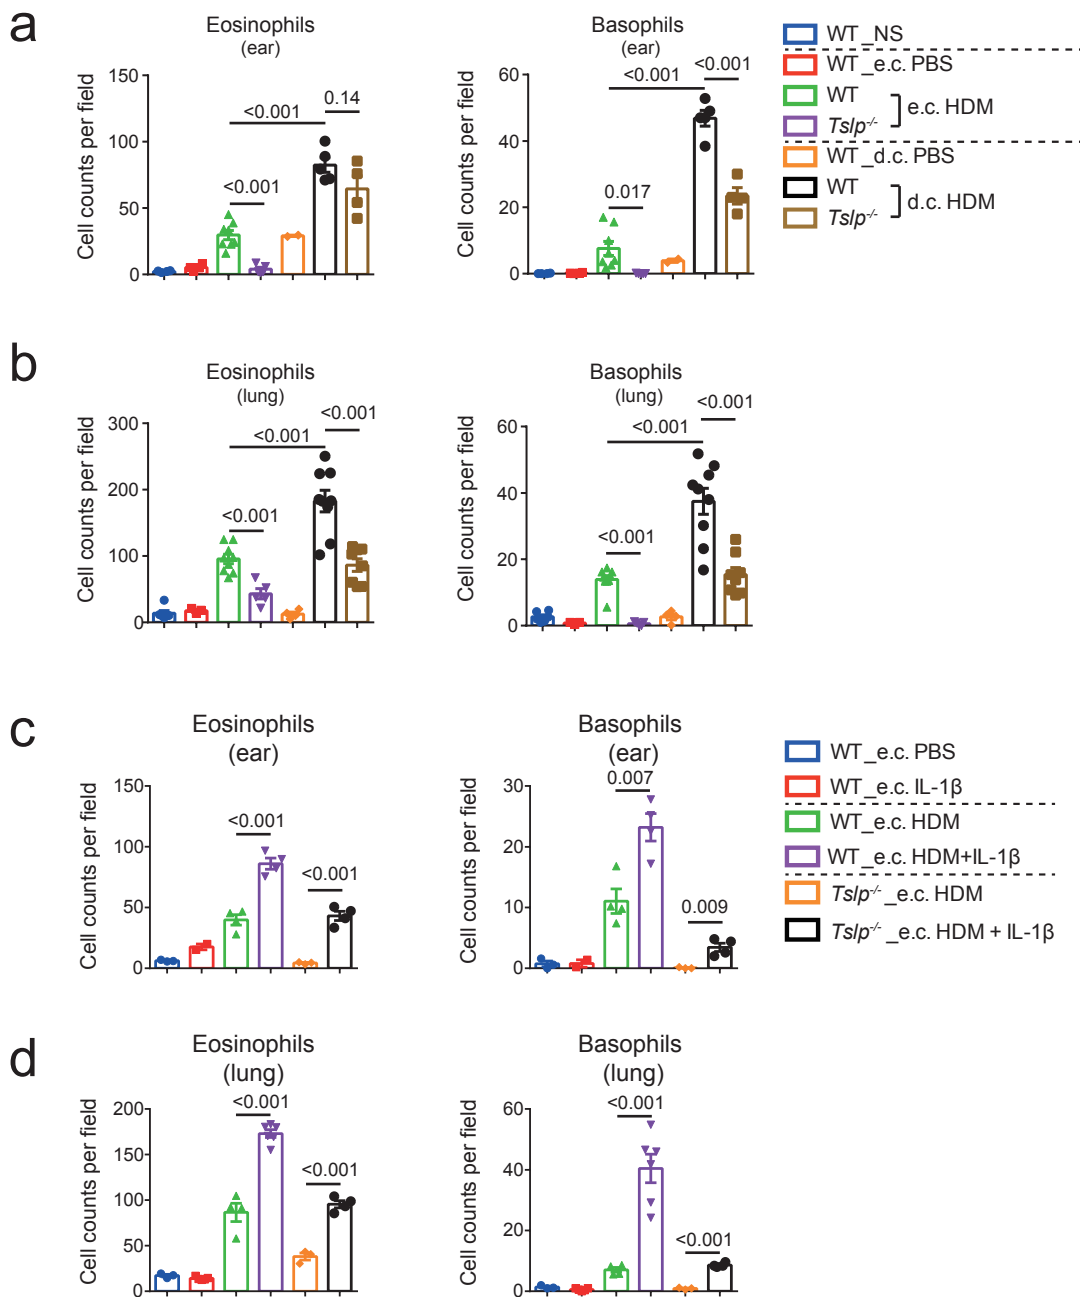

**Supplementary Figure 1. Summary of cell counts for skin- or lung-infiltrating eosinophils and basophils from immunostained paraffin sections.** One point corresponds to the average number of positively stained cells per microscopic field (at x 20 magnification) from 5 microscopic fields of the section of one mouse biopsy. **(a-b)** Mice were treated as described in **Fig. 1d**. Cell counts of eosinophils and basophils in ears (**a**; related to **Fig. 1e**; n=4, 4, 8, 5, 2, 5, 4 mice) or lungs (**b**; related to **Fig. 2d**; n=6, 3, 9, 5, 4, 9, 8 mice). **(c-d)** Mice were treated as described in **Fig. 3c**. Cell counts of eosinophils and basophils in ears (**c**; related to **Fig. 3e**; n=3, 2, 4, 4, 3, 4 mice) or lungs (**d**; related to **Fig. 4d**; n=3, 5, 4, 6, 3, 4 mice). Graphs show mean $\pm$ SEM. Two-sided Student's t-test. p values are indicated. Source data are provided as a Source data file.

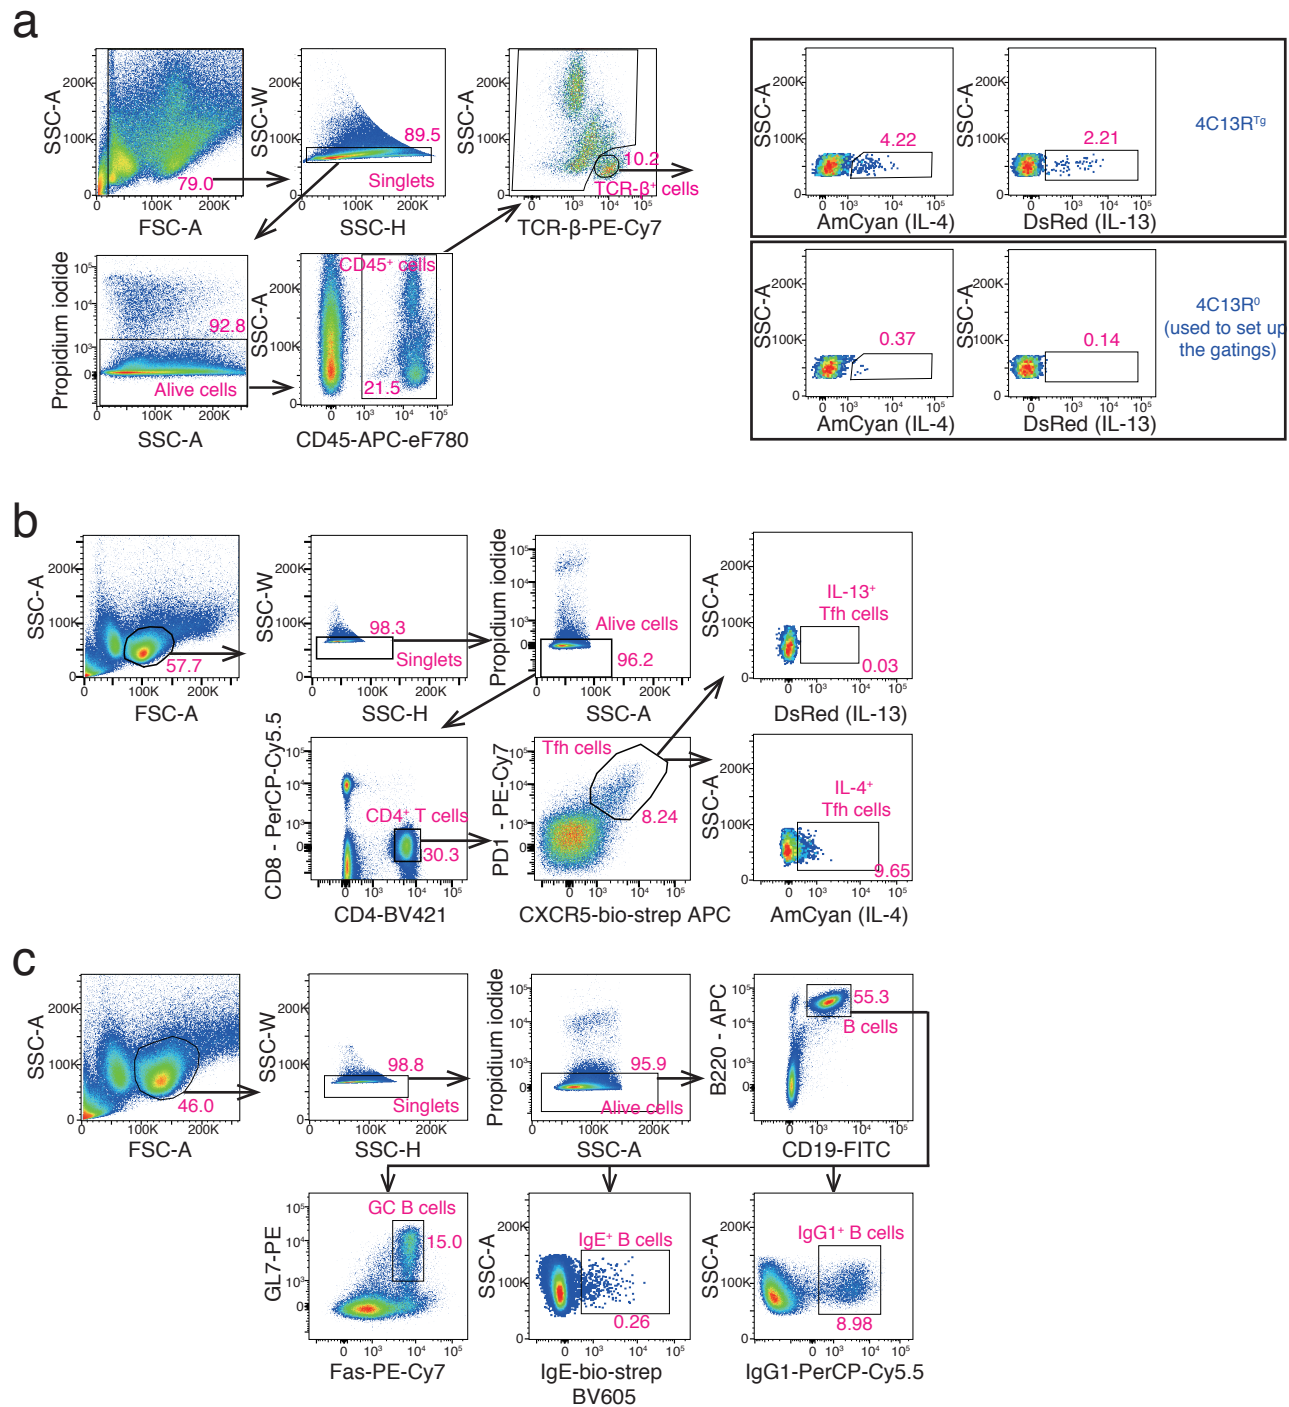

**Supplementary Figure 2. Gating strategy for cells from e.c HDM- or d.c. HDM-treated 4C13R<sup>Tg</sup> mice.** **a** Gating strategy for IL-4 and IL-13 expression by TCR $\beta$ <sup>+</sup> cells in skin dermis, using Il4/Il13 dual reporter 4C13R<sup>Tg</sup> mice. After excluding debris, doublets and dead cells, hematopoietic cells were gated as CD45<sup>+</sup>. CD45<sup>+</sup>TCR- $\beta$ <sup>+</sup> cells were further gated for AmCyan (IL-4)<sup>+</sup> and DsRed(IL-13)<sup>+</sup> to examine cytokine production. Gates for Amcyan(IL-4) and DsRed(IL-13) are set with 4C13R<sup>0</sup> mice. **b** Gating strategy for Tfh cells in ear-draining lymph nodes (EDLNs). Alive single cells are gated for CD4 to identify CD4<sup>+</sup> T cells, Tfh cells are further gated as CXCR5<sup>+</sup>PD1<sup>+</sup> population. AmCyan (IL-4) or DsRed (IL-13) expressed in Tfh cells is gated in 4C13R<sup>Tg</sup> mice, showing that Tfh cells express AmCyan (IL-4) but not DsRed (IL-13), as expected. **c** Gating strategy for B cells in EDLNs. B cells are gated as CD19<sup>+</sup>B220<sup>+</sup> cells. Inside B cells, germinal center (GC) B cells are gated as GL7<sup>+</sup>Fas<sup>+</sup> population. B cells are also gated for IgE<sup>+</sup> and IgG1<sup>+</sup> cells.

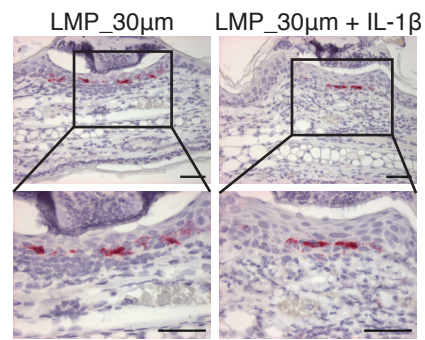

**Supplementary Figure 3. Administration of IL-1 $\beta$  on LMP\_30 $\mu$ m ears does not induce TSLP expression in ears.** Ears from wildtype Balb/c mice were treated with LMP\_30 $\mu$ m or LMP\_30 $\mu$ m + 1 $\mu$ g of IL-1 $\beta$  (Cat No. 575106, Biolegend). Ears were collected 48h after treatment. RNAscope in situ hybridization for TSLP mRNA. Bar = 50 $\mu$ m for all pictures. Data are representative of 2 independent experiments with similar results.

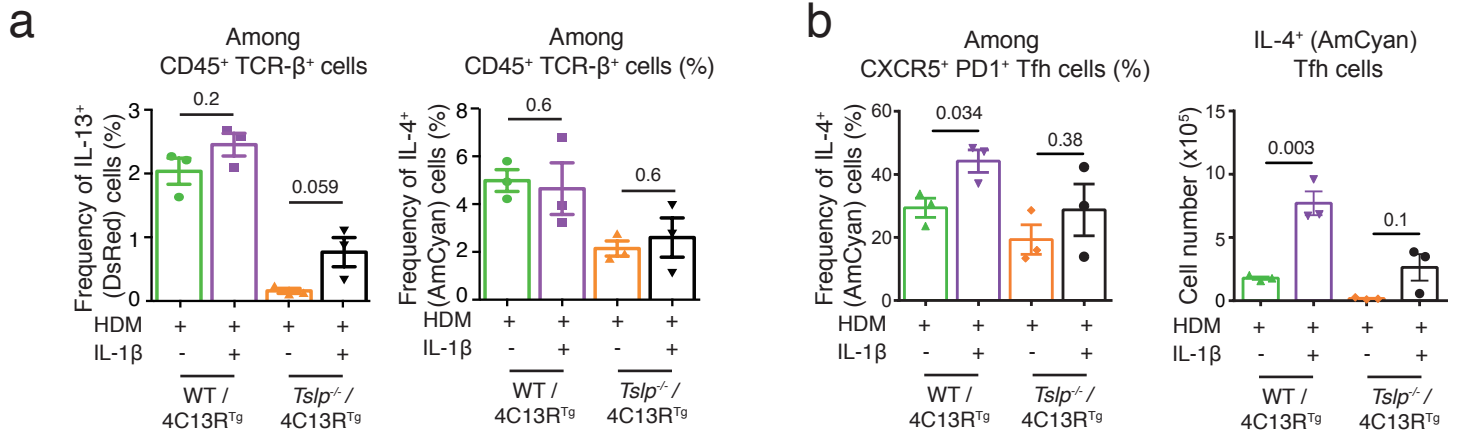

**Supplementary Figure 4. Co-administration of IL-1β with e.c. HDM enhances IL-13 expression by Th2 cells in the skin and IL-4 expression by Tfh cells in ear-draining lymph nodes (EDLNs), in a TSLP-independent manner.** Mice were treated with an experimental protocol as shown in **Fig. 3c**. **a** Frequency of IL-13<sup>+</sup> (DsRed) or IL-4<sup>+</sup> (AmCyan) cells among CD45<sup>+</sup> TCR-β<sup>+</sup> cells in ears, analyzed in WT and *Tslp*<sup>-/-</sup> mice in 4C13R<sup>Tg</sup> background, showing that IL-1β administered with e.c. HDM appears to enhance IL-13 expression by skin TCR-β<sup>+</sup> cells in both WT and *Tslp*<sup>-/-</sup> mice. **b** Administration of IL-1β promotes IL-4-expressing Tfh cells in EDLNs. Graphs show mean±SEM; n=3 mice per group; Two-sided Student's t-test. p values are indicated. Data are representative of 2 independent experiments with similar results. Source data are provided as a Source data file.

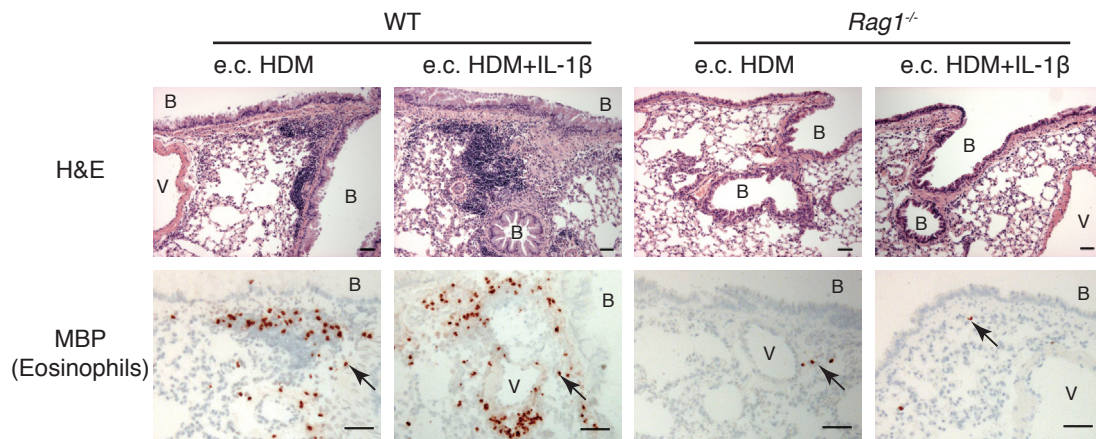

**Supplementary Figure 5. Co-administration of IL-1 $\beta$  does not have any exacerbation of asthmatic phenotype in *Rag1*<sup>-/-</sup> mice.** Mice were treated as described in Fig. 3c. H&E and IHC for MBP (for eosinophils) in the lung sections from WT and *Rag1*<sup>-/-</sup> mice. B: bronchiole; V: blood vessel. Bar = 50 $\mu$ m for all pictures. Data are representative of 2 independent experiments with similar results.

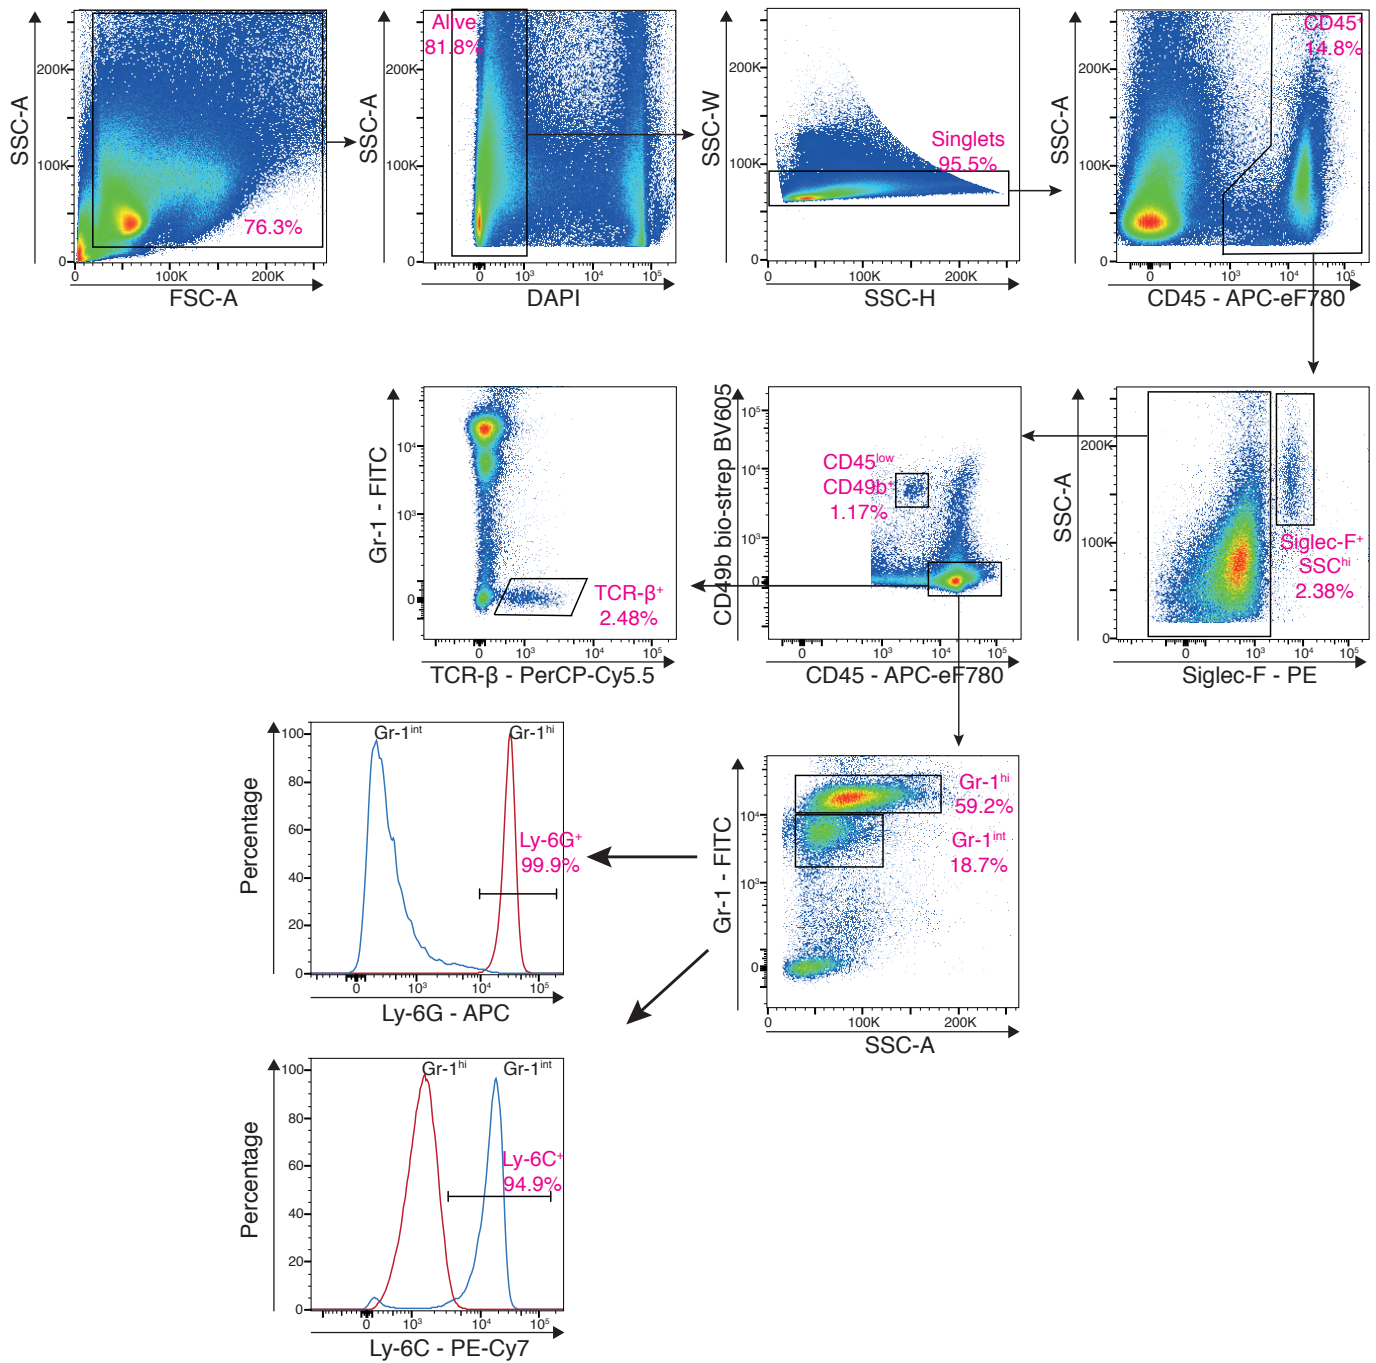

**Supplementary Figure 6. Gating strategy for cells prepared from d.c. HDM-sensitized skin at 24h after treatment.** After removing debris, dead cells and doublets, hematopoietic cells were gated as CD45<sup>+</sup>. Eosinophils were gated as CD45<sup>+</sup> Siglec-F<sup>+</sup> SSC-A<sup>hi</sup>. Basophils were gated as CD45<sup>low</sup> Siglec-F<sup>-</sup> CD49b<sup>+</sup>. TCR-β<sup>+</sup> T cells were gated as CD45<sup>+</sup> Siglec-F<sup>-</sup> CD49b<sup>-</sup> TCR-β<sup>+</sup>. Neutrophils were gated as CD45<sup>+</sup> Siglec-F<sup>-</sup> CD49b<sup>-</sup> Gr-1<sup>hi</sup>. Monocytes / macrophages were gated as CD45<sup>+</sup> Siglec-F<sup>-</sup> CD49b<sup>-</sup> Gr-1<sup>int</sup>. Gr-1<sup>hi</sup> and Gr-1<sup>int</sup> cells were further analysed for their expression of Ly-6G and Ly-6C, showing that as previously reported (Rose, S. et. al. 2012 PMID: 22213571), Gr-1<sup>hi</sup> represent Ly-6G<sup>+</sup> Ly-6C<sup>-</sup> neutrophils, whereas Gr-1<sup>int</sup> represent Ly6C<sup>+</sup> Ly-6G<sup>-</sup> monocytes/macrophages.



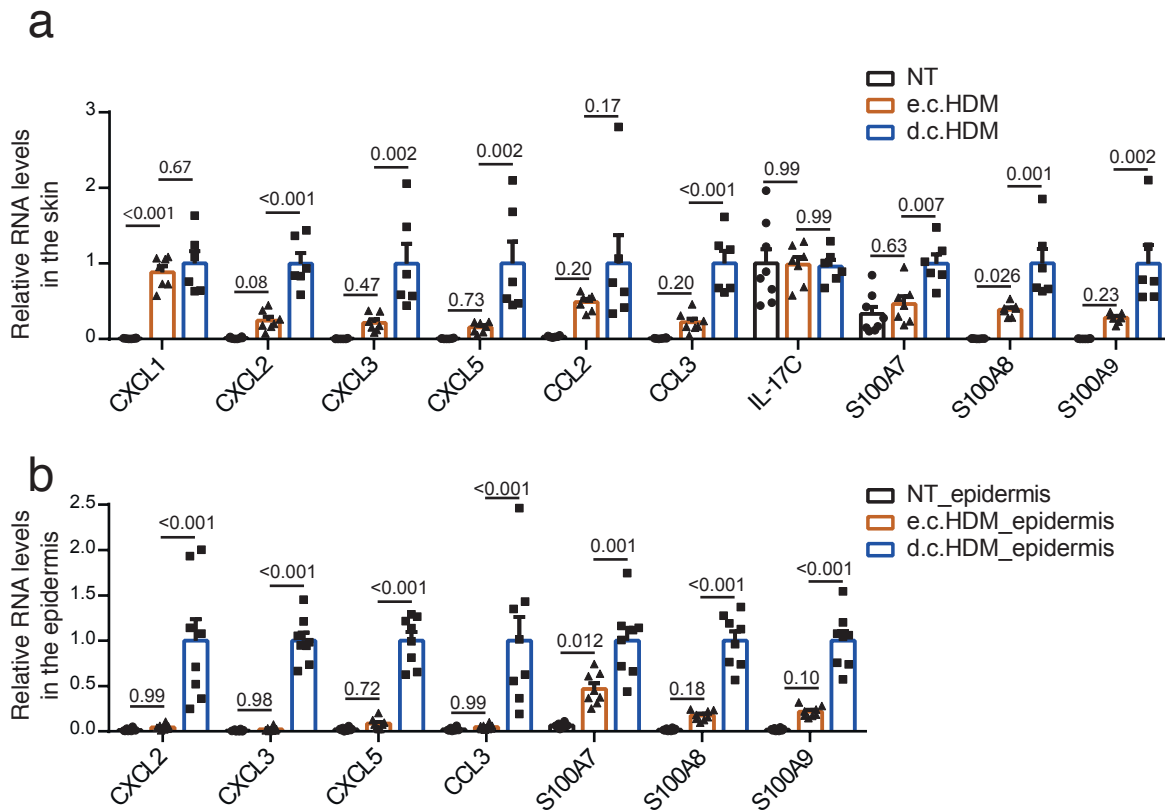

**Supplementary Figure 7. Increased expression of neutrophil-attractant factors in d.c. HDM-treated skin.** HDM (2 $\mu$ g) was applied on LMP\_30 $\mu$ m (e.c. HDM) and LMP\_91 $\mu$ m (d.c. HDM) ears of wildtype mice, and analysed 24 hrs later by quantitative RT-PCR (RT-qPCR). **a** Relative RNA levels of neutrophil chemoattractant factors in the skin from non-treated (NT), e.c. HDM and d.c. HDM-treated mice. n=6, 7 or 8 mice per group. **b** Relative RNA levels of neutrophil chemoattractant factors in the isolated epidermis (following the separation of epidermis and dermis from the ears incubated with 2.5 mg/ml dispase at 4°C overnight) from NT, e.c. HDM and d.c. HDM-treated mice. n=8 mice per group. Graphs show mean $\pm$ SEM. One-way ANOVA test. p values are indicated. All data are representative of 2 independent experiments with similar results. Source data are provided as a Source data file.

Sequences of PCR primers are: CXCL1 (GCTGGGATTCACCTCAAGAA; AGGTGCCATCAGAGCAGTCT, 208 bp) ; CXCL2 (AGTGAAGTGCCTGTCAATG; TTCAGGGTCAAGGCAAACCTT, 153 bp) ; CXCL3 (ATCCAGAGCTTGACGGTGAC; TCATCATGGTGAAGGGCTTC, 189 bp) ; CXCL5 (GTCCACAGTGCCCTACGG; ACTGCGCGTTCTTTCCACTG, 164 bp) ; CCL2 (GGTCCCTGTCATGCTTCTGG; CTTCTTGGGGTCAGCACAGA, 235 bp) ; CCL3 (GCAACCAAGTCTTCTCAGCG; TCTTTGGAGTCAGCGCAGAT, 181 bp) ; IL-17C (TGCTGGAAGCTGACACTCAC; CGTTGATGCATCCACGACAC, 123 bp) ; S100A7 (CTTGTCCCTGGAGGAGTTGA; GCTTGC-CCAAGATGTACAGG, 167 bp) ; S100A8 (GGAAATCACCATGCCCTCTA; GAGATGCCACACCCACTTTT, 178 bp) ; S100A9 (AGATGGCCAACAAAGCACCT; TGTGTCCAGGTCTCCATGA, 208 bp).

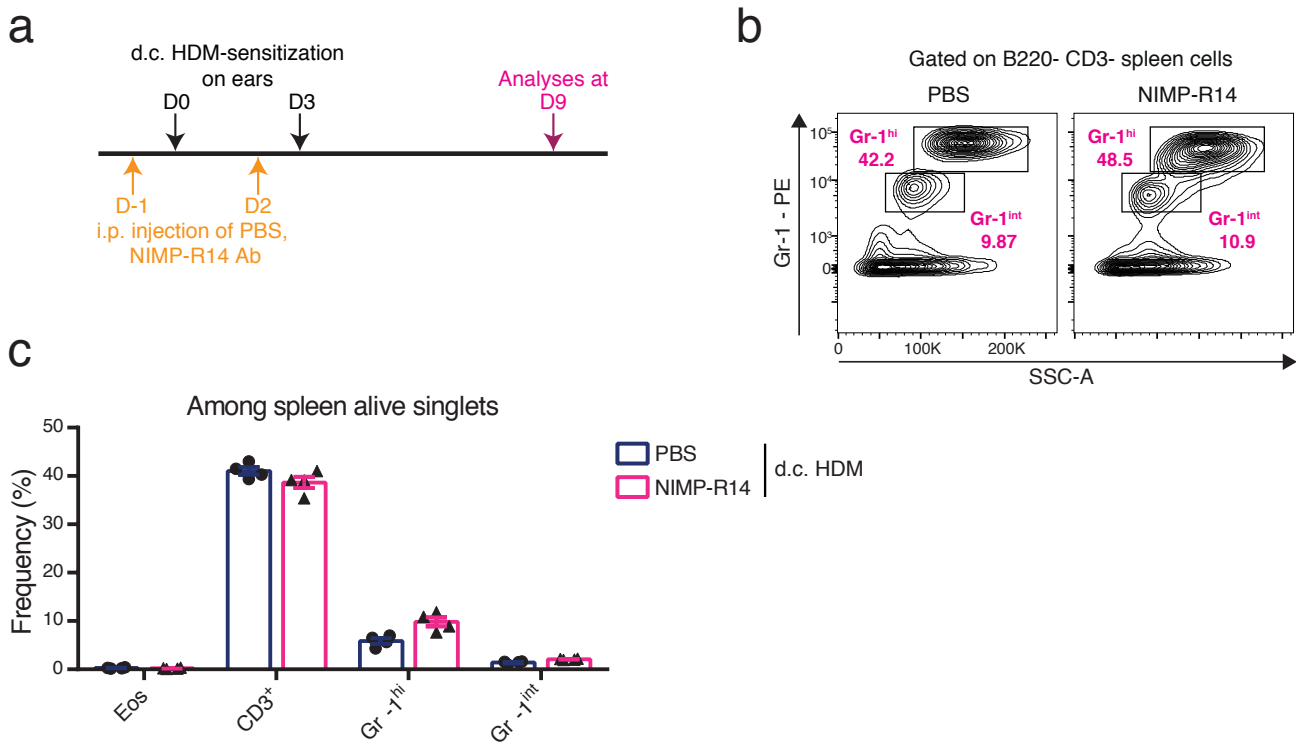

**Supplementary Figure 8. Gr-1<sup>hi</sup> and Gr-1<sup>int</sup> cells are recovered at D9 following the administration of NIMP-R14 antibody.** **a** Experimental protocol. Wild type Balb/c mice were intraperitoneally (i.p.) injected with PBS or NIMP-R14 antibody (100 $\mu$ g) at D-1 and D2. Mice were d.c. sensitized with HDM (2  $\mu$ g) on LMP<sub>91</sub> $\mu$ m ears at D0 and D3. Spleen was analysed at D9 to examine the recovery of Gr-1<sup>hi</sup> and Gr-1<sup>int</sup> cells (the time point before intranasal (i.n.) HDM challenge; see the experimental protocol presented in Figure 6a). **b** Representative FACS plots of Gr-1<sup>hi</sup> and Gr-1<sup>int</sup> cells. **c** Comparison of frequency of eosinophils (eos), CD3<sup>+</sup> cells, Gr-1<sup>hi</sup> and Gr-1<sup>int</sup> cells, showing similar Gr-1<sup>hi</sup> and Gr-1<sup>int</sup> cell percentages in NIMP-R14 and PBS-administrated mice. Data shown are mean $\pm$ SEM; n=4 mice per group. Source data are provided as a Source data file.



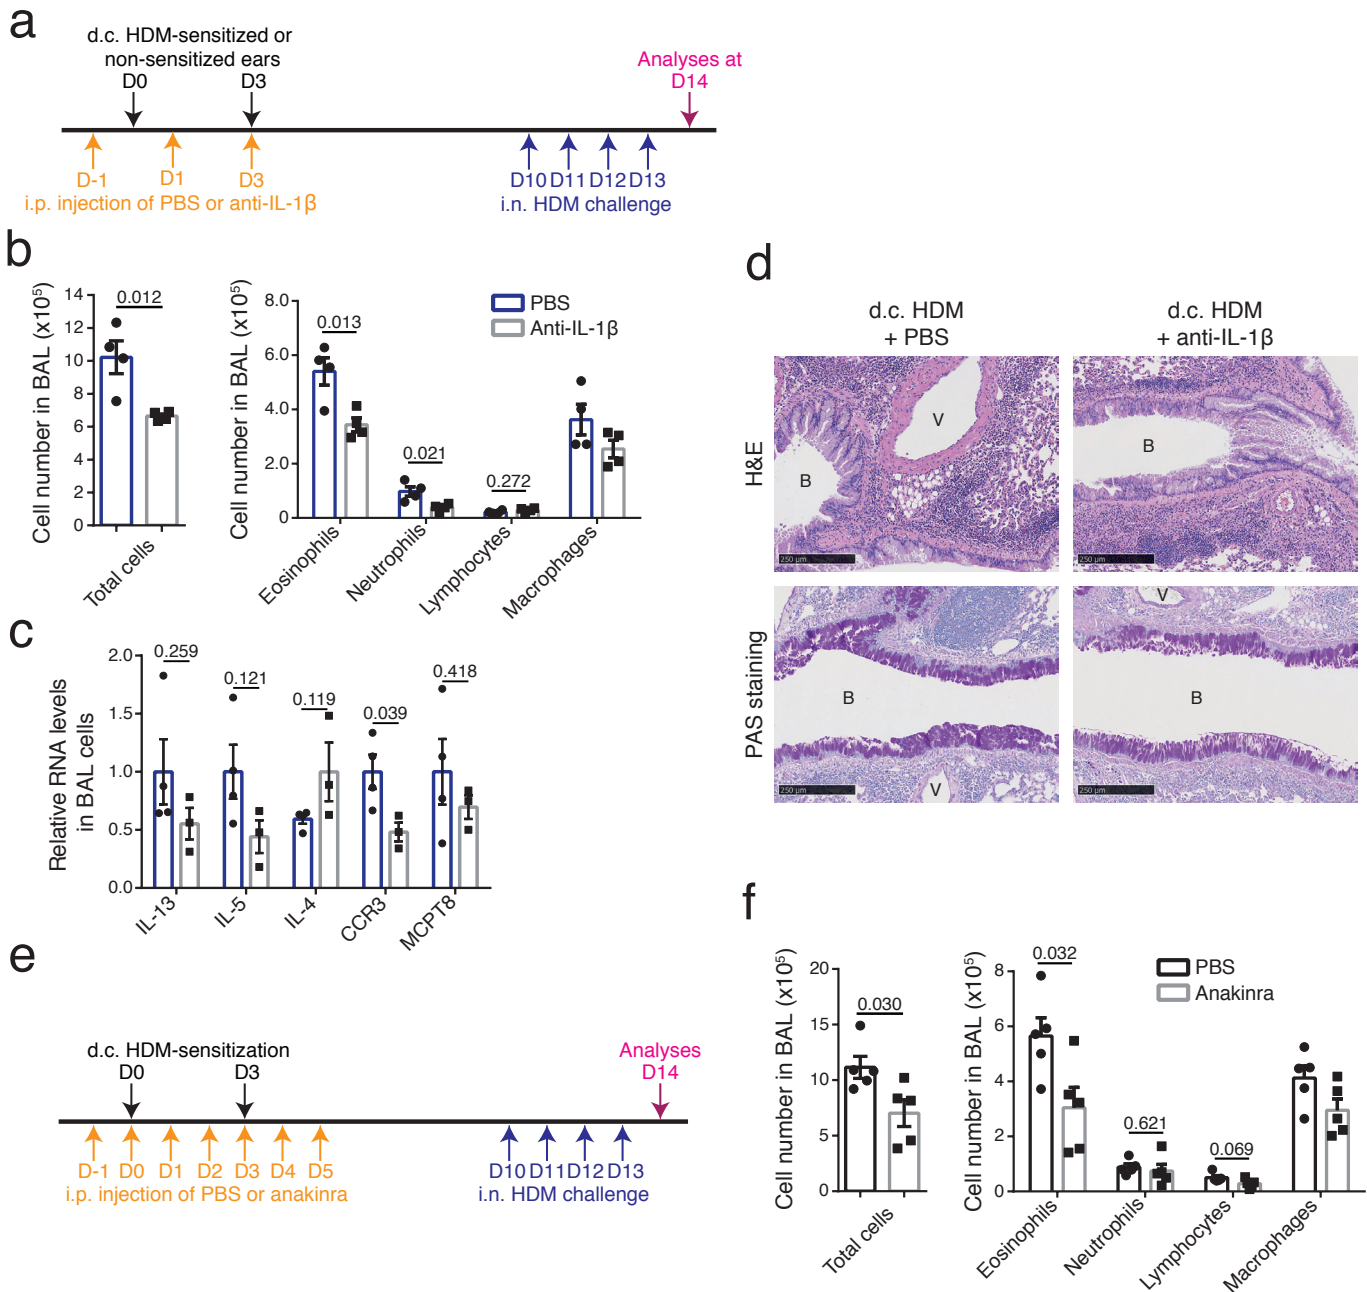

**Supplementary Figure 9. The administration of anti-IL-1 $\beta$  antibody or Anakinra during d.c. HDM sensitization tends to reduce the subsequent asthmatic phenotypes.**

**a** Experimental protocol. Wild type Balb/c mice were intraperitoneally (i.p.) injected either with PBS or 200 $\mu$ g of anti-IL-1 $\beta$  antibody (clone B122, Cat No. BE0246, BioXCell) at D-1, D1 and D3. 2 $\mu$ g of HDM was applied on LMP\_91  $\mu$ m ears at D0 and D3 to induce d.c. HDM sensitization. Mice were then intranasally (i.n.) challenged with 2 $\mu$ g of HDM from D10 to D13. Mice were analysed at D14. **b** Total cell number and differential counting for eosinophils, neutrophils, lymphocytes and macrophages in BAL fluid. n=4 mice per group. **c** Relative RNA levels of genes in BAL cells. n=4, 3 mice per group. **d** Lung sections were stained with haematoxylin & eosin (H&E) for histological analyses or Periodic Acid Schiff (PAS) for goblet cell hyperplasia analyses. B: bronchiole. V: blood vessel. Bar=250  $\mu$ m for all pictures. **e** Experimental protocol. Wild type Balb/c mice were i.p. injected either with PBS or 10 mg of anakinra (Kineret, Amgen) from D-1 to D5. 2 $\mu$ g of HDM was applied on LMP\_91 $\mu$ m ears at D0 and D3 to induce d.c. HDM sensitization. Mice were then i.n. challenged with 2 $\mu$ g of HDM from D10 to D13, and analysed at D14. **f** Total cell number and differential counting for eosinophils, neutrophils, lymphocytes and macrophages in BAL fluid. n=5 mice per group. Graphs in **b**, **c**, **f** show mean $\pm$ SEM; Two-sided Student's t-test. All data are representative of 2 independent experiments with similar results. Source data are provided as a Source data file.

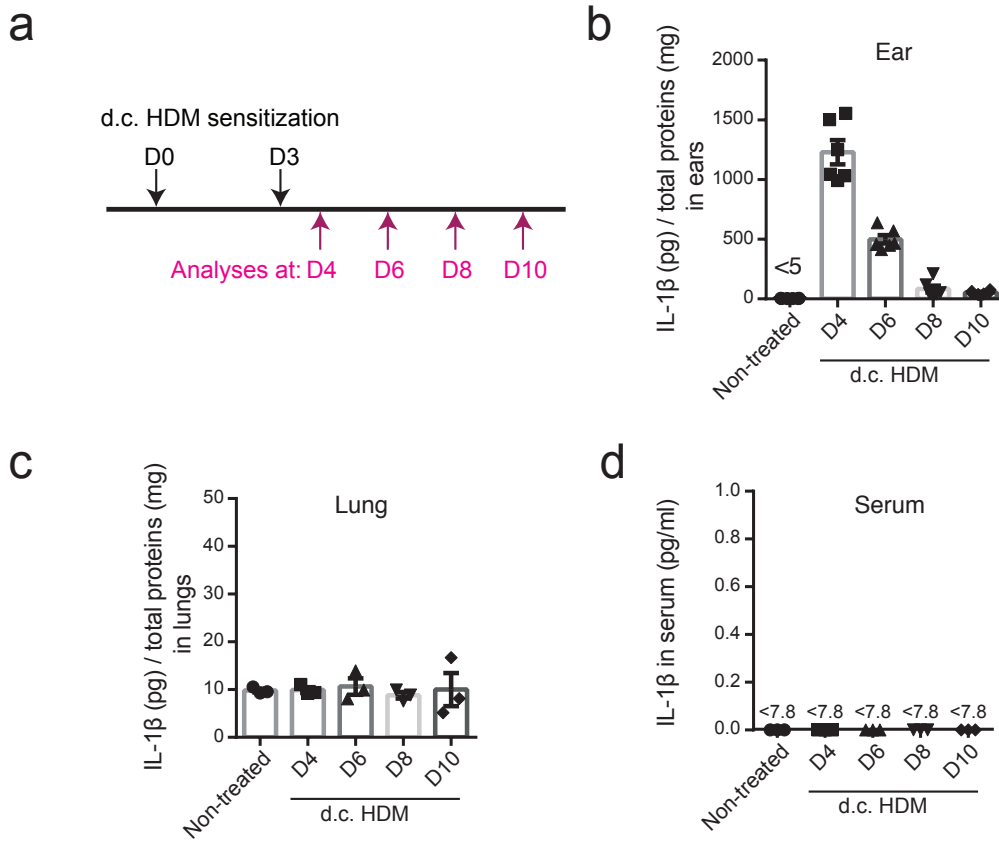

**Supplementary Fig. 10. IL-1 $\beta$  levels in skin, lung and serum following d.c. HDM sensitization.** **a** Experimental protocol. Wildtype Balb/c mice were dermatically (d.c.) sensitized with HDM (2 $\mu$ g) at D0 and D3, and IL-1 $\beta$  levels in ears (**b**), lungs (**c**) and sera (**d**) were measured by ELISA at D4, D6, D8 or D10, showing that an increase in IL-1 $\beta$  was detected in the treated ears, which reduced with the time, but was not detected in the lung or in the serum. Data shown are mean  $\pm$  SEM. n=6 mouse ears (**b**) and n=3 mice (**c**, **d**) per group. Source data are provided as a Source data file.
